# Supplementary material for: Proteomic analysis of mismatch repair-mediated alkylating agent-induced DNA damage response
Source: PubMed Central journal article supplement (PMC3848634; doi:10.1186/2045-3701-3-37), 2013-09-19

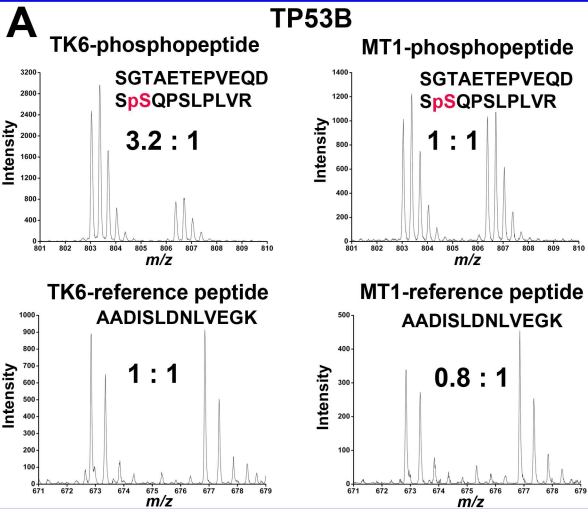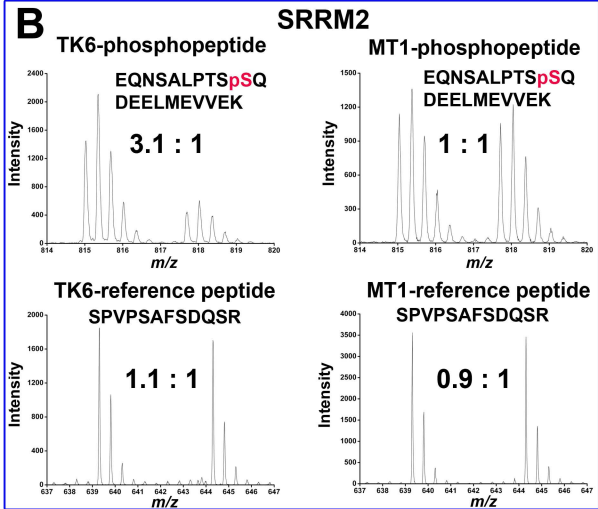

Supplement: 2045-3701-3-37-S5.pdf [file 2045-3701-3-37-S5.pdf]
