# Supplementary material for: Proteomic analysis of mismatch repair-mediated alkylating agent-induced DNA damage response
Source: PubMed Central journal article supplement (PMC3848634; doi:10.1186/2045-3701-3-37), 2013-09-19

## RNA processing and splicing

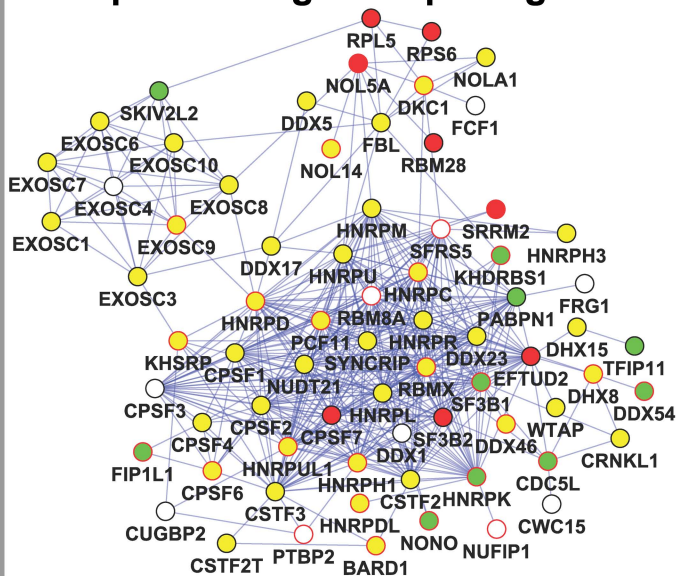

## TK6 Nuclear network

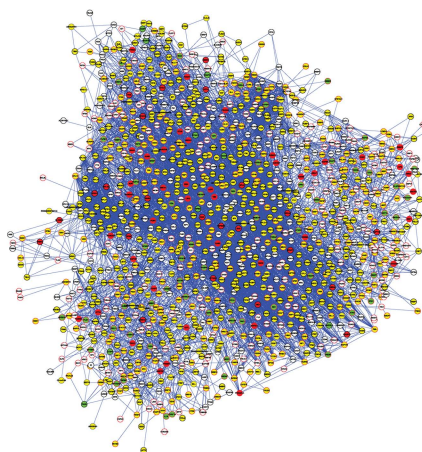

Nodes: 1285  
Edges: 8427

### Regulation:

#### Protein expression:

- only identified
- down (<-1.5)
- no change
- up (>+1.5)

#### Phosphorylation:

- only identified
- down (<-1.5)
- no change
- up (>+1.5)

## Cell cycle

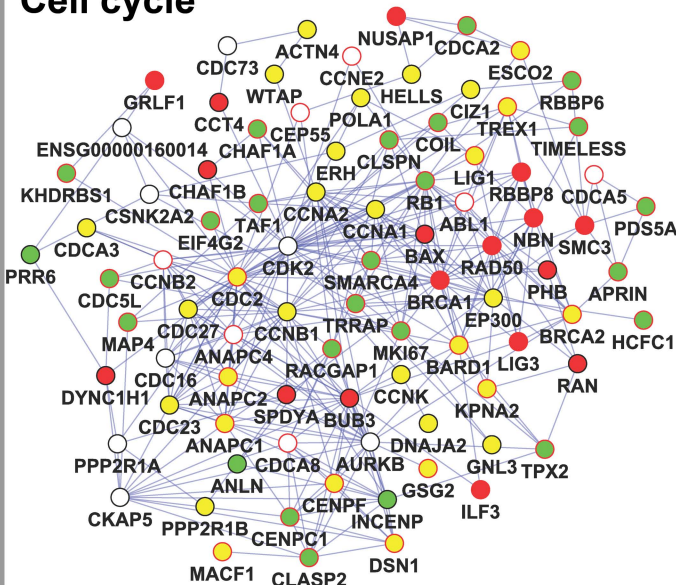

## Transcription

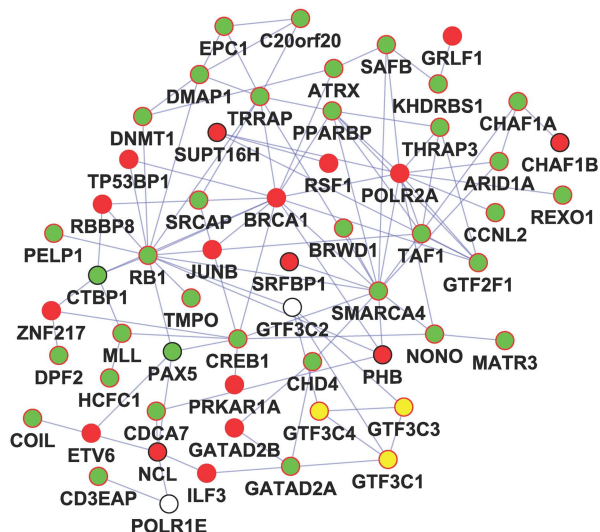

Supplement: 2045-3701-3-37-S6.pdf [file 2045-3701-3-37-S6.pdf]
